# Supplementary material for: A Novel Role for Polycystin-2 (Pkd2) in P. tetraurelia as a Probable Mg2+ Channel Necessary for Mg2+-Induced Behavior
Source: PubMed Central journal article supplement (PMC6627415; doi:10.3390/genes10060455), 2019-06-14
Supplement: genes-10-00455-s001.pdf [file genes-10-00455-s001.pdf]

Supplementary Material

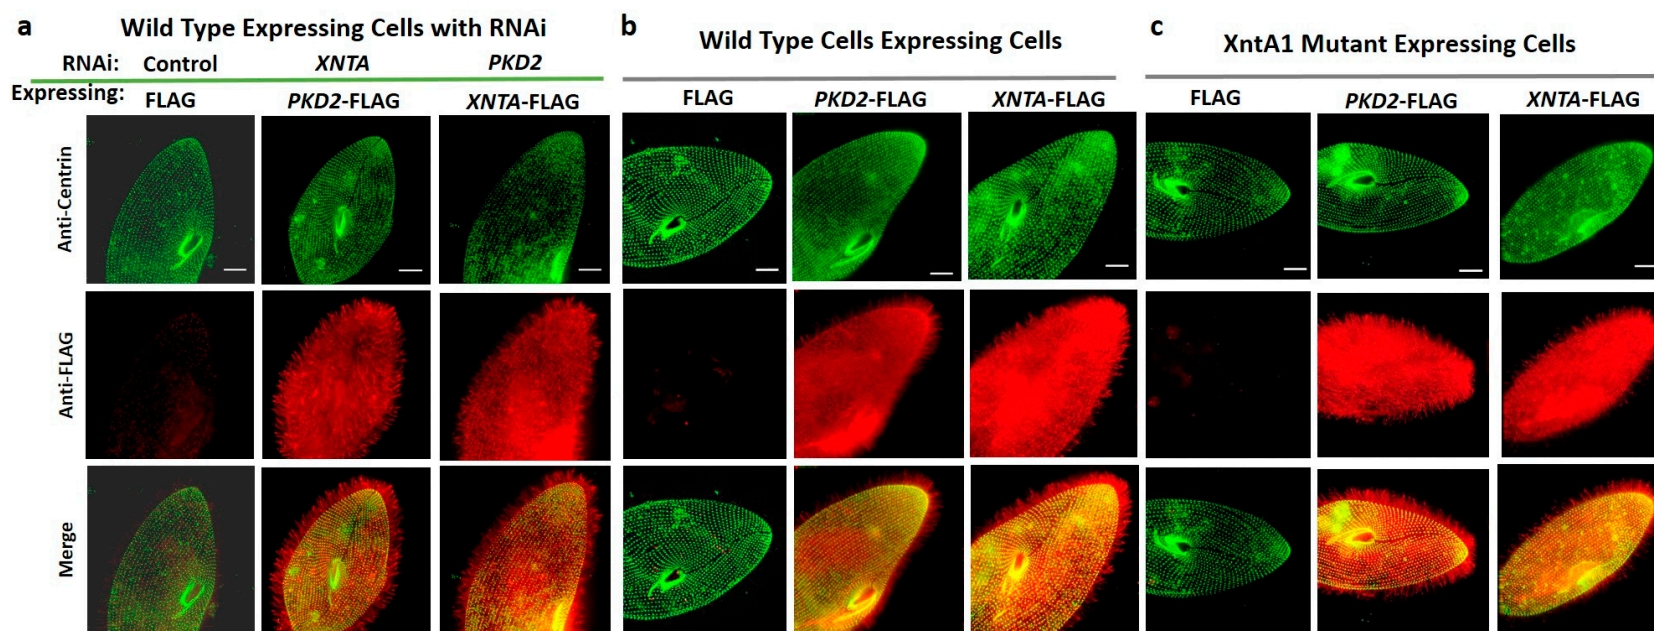

**Figure S1.** Pkd2-FLAG and XntA-FLAG are found in the cilia and the cell membrane and do not require each other for their localization. (a) Expression of FLAG (Control), *PKD2*-FLAG, or *XNTA*-FLAG in wild type (WT) cells fed RNAi for L4440 (Control), *XNTA*, or *PKD2*, respectively (from Figure 2). Cells were immunostained with anti-centrin to highlight the basal bodies just below the cell surface (green) and anti-FLAG to show the expressed protein (red). (b) WT cells expressing FLAG, *PKD2*-FLAG, or *XNTA*-FLAG to show the Pkd2-FLAG or XntA-FLAG proteins are located in the cilia and at the cell surface. (c) XntA1 mutant cells expressing FLAG, *PKD2*-FLAG, or *XNTA*-FLAG showing no change in the location of the expressed proteins in the mutant compared to WT cells. Pkd2-FLAG and XntA-FLAG are located in the cilia and at the cell surface. Cells are representative of the majority of the population imaged, scale bars represent 15  $\mu$ m.

**Table S1.** Average  $\Delta V_m$  in 0.5 mM MgCl<sub>2</sub> with 1 mM KCl and average resting membrane potentials of cells in 1 mM and 5 mM KCl.

| Ciliated cells               |                            | Resting Membrane Potential $\pm$ StDev (N) |                       |
|------------------------------|----------------------------|--------------------------------------------|-----------------------|
| Cell Type                    | $\Delta V_m \pm$ StDev (N) | 5 mM KCl                                   | 1 mM KCl              |
| Wild Type (WT)               | 11.4 $\pm$ 2.7 (9)         | -27.7 $\pm$ 6.6 (20)                       | -46.4 $\pm$ 10.6 (20) |
| XntA1                        | 3.1 $\pm$ 3.2 (11)         | -30.7 $\pm$ 7.4 (17)                       | -49.4 $\pm$ 10.6 (16) |
| WT, <i>PKD2</i> RNAi         | 6.9 $\pm$ 3.4 (9)          | -27.5 $\pm$ 8.9 (13)                       | -45.6 $\pm$ 10.3 (21) |
| WT, <i>XNTA</i> RNAi         | 4.7 $\pm$ 4.9 (7)          | -26.3 $\pm$ 3.3 (9)                        | -44.3 $\pm$ 4.5 (13)  |
| XntA1, <i>PKD2</i> RNAi      | 3.2 $\pm$ 1.7 (5)          | -25.0 $\pm$ 3.0 (5)                        | -45.5 $\pm$ 6.5 (5)   |
| Expressing Cells             |                            |                                            |                       |
| WT exp. FLAG                 | 10.8 $\pm$ 2.6 (7)         | -27.7 $\pm$ 6.6 (9)                        | -46.4 $\pm$ 6.2 (9)   |
| WT exp. <i>PKD2</i> -FLAG    | 20.1 $\pm$ 3.2 (8)         | -28.6 $\pm$ 6.9 (7)                        | -47.0 $\pm$ 6.3 (9)   |
| XntA1 exp. FLAG              | 2.7 $\pm$ 3.0 (9)          | -28.7 $\pm$ 4.0 (9)                        | -49.8 $\pm$ 6.9 (10)  |
| XntA1 exp. <i>PKD2</i> -FLAG | 11.6 $\pm$ 3.1 (9)         | -29.7 $\pm$ 5.5 (7)                        | -53.1 $\pm$ 5.2 (8)   |
| Deciliated Cells             |                            | Resting Membrane Potential $\pm$ StDev (N) |                       |
| Cell Type                    | $\Delta V_m \pm$ StDev (N) | 5 mM KCl                                   | 1 mM KCl              |
| Wild Type (WT)               | 16.1 $\pm$ 2.5 (9)         | -28.4 $\pm$ 4.9 (16)                       | -47.5 $\pm$ 10.3 (11) |
| XntA1                        | 16.2 $\pm$ 5.6 (11)        | -30.6 $\pm$ 7.7 (16)                       | -49.5 $\pm$ 10.0 (19) |
| WT, <i>PKD2</i> RNAi         | 10.8 $\pm$ 4.2 (9)         | -29.1 $\pm$ 6.0 (10)                       | -46.1 $\pm$ 8.6 (9)   |
| WT, <i>XNTA</i> RNAi         | 18.7 $\pm$ 6.6 (8)         | -27.6 $\pm$ 3.4 (13)                       | -48.9 $\pm$ 5.8 (15)  |
| XntA1, <i>PKD2</i> RNAi      | 4.3 $\pm$ 3.3 (6)          | -27.2 $\pm$ 4.4 (6)                        | -53.9 $\pm$ 5.2 (6)   |
| Expressing Cells             |                            |                                            |                       |
| WT exp. FLAG                 | 16.4 $\pm$ 1.4 (9)         | -30.1 $\pm$ 6.1 (11)                       | -47.5 $\pm$ 6.8 (13)  |
| WT exp. <i>PKD2</i> -FLAG    | 22.2 $\pm$ 5.3 (9)         | -29.9 $\pm$ 6.5 (8)                        | -51.7 $\pm$ 7.8 (8)   |
| XntA1 exp. FLAG              | 14.0 $\pm$ 1.7 (9)         | -32.0 $\pm$ 4.9 (9)                        | -51.6 $\pm$ 7.1 (10)  |
| XntA1 exp. <i>PKD2</i> -FLAG | 13.3 $\pm$ 3.8 (11)        | -32.0 $\pm$ 6.9 (12)                       | -53.4 $\pm$ 5.3 (13)  |

**Table S2.** Average Swimming speeds in mm/sec  $\pm$  SD (N) as cells leave 1 mM KCl and enter either 1 mM KCl (control) or 0.5 mM MgCl<sub>2</sub> with 1 mM KCl (test).

| Cell Type                    | 1 mM KCl to           |                                        |
|------------------------------|-----------------------|----------------------------------------|
|                              | 1 mM KCl to 1 mM KCl  | 0.5 mM MgCl <sub>2</sub> with 1 mM KCl |
| Wild Type (WT)               | 1.57 $\pm$ 0.18 (158) | 1.25 $\pm$ 0.26 (227) <sup>†</sup>     |
| WT exp. FLAG                 | 1.55 $\pm$ 0.20 (224) | 1.20 $\pm$ 0.31 (389) <sup>†</sup>     |
| WT exp. <i>PKD2</i> -FLAG    | 1.59 $\pm$ 0.23 (406) | 1.12 $\pm$ 0.36 (820) <sup>†</sup> *** |
| XntA1                        | 1.58 $\pm$ 0.22 (199) | 1.54 $\pm$ 0.24 (213)                  |
| XntA1 exp. FLAG              | 1.57 $\pm$ 0.28 (225) | 1.52 $\pm$ 0.31 (245)                  |
| XntA1 exp. <i>PKD2</i> -FLAG | 1.52 $\pm$ 0.25 (134) | 1.45 $\pm$ 0.25 (190) <sup>†</sup> **  |

<sup>†</sup> = Indicates significantly different compared to the same cell type swimming speed in 1 mM KCl (\*\*= $P$ <0.01).

\*\*\* = WT expressing (exp.) *PKD2*-FLAG are significantly different compared to WT or WT exp. FLAG ( $P$ <0.001; T-tests).

\*\*=XntA1 exp. *PKD2*-FLAG are significantly different compared to XntA1 mutants or XntA1 mutants exp. FLAG ( $P$ <0.01; T-tests).
